# Supplementary material
Source: PubMed Central journal article supplement (PMC5856554)
Supplement: pnas.201721022SI.pdf [file pnas.201721022SI.pdf]

# Supporting Information

Culik et al. 10.1073/pnas.1721022115

## SI Text

As described in the main text,  $Zn^{2+}$  was added progressively to a solution of apoSOD1<sup>2SH</sup> and the intensities of the cross-peaks in <sup>1</sup>H-<sup>15</sup>N correlation spectra were quantified as a function of added metal (Fig. 2). The intensity profiles of the residues were fit to a sequential binding model of the form:

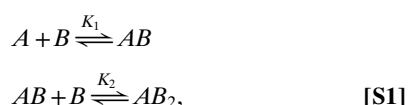

where  $A$  refers to apoSOD1<sup>2SH</sup> and  $B$  to  $Zn^{2+}$ . The dissociation constants for  $Zn^{2+}$  binding to the Zn ( $K_{d1}$ ) and the Cu ( $K_{d2}$ ) sites are inverses of  $K_1$  and  $K_2$ , respectively, such that

$$K_1 = \frac{1}{K_{d1}} = \frac{[AB]}{[A][B]} \quad [S2]$$

and

$$K_2 = \frac{1}{K_{d2}} = \frac{[AB_2]}{[AB][B]}. \quad [S3]$$

If  $A_T$  and  $B_T$  are the total concentrations of protein (SOD1<sup>2SH</sup>) and  $Zn^{2+}$  in solution at any titration point, the mass balance equations for this system can be written as follows:

$$A_T = [A] + [AB] + [AB_2] \quad [S4]$$

and

$$B_T = [B] + [AB] + 2[AB_2], \quad [S5]$$

which gives

$$[A] = A_T - [AB] - [AB_2] \quad [S6]$$

and

$$[B] = B_T - [AB] - 2[AB_2]. \quad [S7]$$

Inserting Eq. S7 into Eq. S3 and solving for  $[AB_2]$  gives the following:

$$[AB_2] = \frac{[AB](B_T - [AB])}{K_{d2} + 2[AB]}. \quad [S8]$$

Substituting for  $[A]$  and  $[B]$  in Eq. S2 using Eqs. S6 and S7, and further replacing  $[AB_2]$  in terms of  $[AB]$  from Eq. S8, yields a cubic equation in  $[AB]$ :

$$a[AB]^3 + b[AB]^2 + c[AB] + d = 0, \quad [S9]$$

where

$$\begin{aligned} a &= 4K_{d1} - K_{d2}, \\ b &= 4K_{d1}K_{d2} - K_{d2}^2 + 2K_{d2}A_T, \\ c &= K_{d1}K_{d2}^2 + K_{d2}^2A_T + K_{d2}^2B_T + K_{d2}B_T^2 - 2K_{d2}A_TB_T, \\ d &= -K_{d2}^2A_TB_T. \end{aligned}$$

The concentration of  $[AB]$  at every point in the titration corresponding to specific  $A_T$  and  $B_T$  values was calculated by numerically solving for the roots of Eq. S9. The correct root was identified through a two-level selection process where roots were discarded if they were negative or larger than  $A_T$ .  $[AB_2]$  was determined from  $[AB]$  using Eq. S8, while  $[B]$  was subsequently obtained from  $[AB]$  and  $[AB_2]$  (Eq. S5). Concentrations were then converted to intensities in the fitting routine using relations provided in Fig. 2, which are specific for each class of peak (see text).

## SI Materials and Methods

**NMR Spectroscopy.** All NMR spectra were acquired on a Varian 600 MHz (14.1 T) spectrometer equipped with a cryogenically cooled probe. The sample temperature was measured using a thermocouple placed inside an NMR tube; all experiments were performed at 25 °C.

**CEST.** All <sup>15</sup>N-CEST datasets were acquired at 600 MHz using a previously reported pulse sequence (52), an exchange duration,  $T_{\text{relax}}$ , of 350 ms, and weak  $B_1$  fields ranging between 21.5 and 26.5 Hz (depending on the experiment), calibrated as described earlier (52). Pseudo-3D datasets containing 89 planes were collected, corresponding to a total acquisition time of 50 h, with the position of the weak  $B_1$  field ranging between 94 and 137 ppm.

**CPMG.** <sup>15</sup>N-CPMG datasets were acquired at a static magnetic field of 600 MHz (14.1 T) using a previously reported pulse scheme (53) and a constant-time CPMG element of 30 ms. Each pseudo-3D experiment comprised 22  $\nu_{\text{CPMG}}$  values, ranging from 33.3 to 1,000 Hz, with three points repeated for error analysis (54), giving rise to net acquisition times of ~17 h per experiment.

**Data Analysis.** NMR datasets were processed with nmrPipe (55) and visualized using nmrDraw and Sparky (55, 56). Resonance intensities were quantified as a function of the frequency of the weak  $B_1$  field in CEST experiments or the frequency of application of 180° pulses in CPMG experiments using the program FuDA ([www.ucl.ac.uk/hansen-lab/](http://www.ucl.ac.uk/hansen-lab/)), whereby peak line shapes were fit globally across all frequency values. CEST profiles,  $I/I_0$  vs.  $B_1$  field position, were constructed from peak intensities recorded with ( $I$ ) and without ( $I_0$ ) the relaxation interval,  $T_{\text{relax}}$ . CPMG profiles,  $R_{2,\text{eff}} = -1/T_{\text{relax}} \ln(I/I_0)$  vs.  $\nu_{\text{CPMG}}$ , were generated from measured  $I$  and  $I_0$  values corresponding to peak intensities with ( $I$ ) and without ( $I_0$ ) the CPMG relaxation element of duration  $T_{\text{relax}}$  (24).

**Backbone Assignment.** Experiments for resonance assignments were recorded at 600 MHz using U-<sup>13</sup>C, <sup>15</sup>N] pWT apoSOD1<sup>S-S</sup>, pWT E,Zn-SOD1<sup>2SH</sup>, and A4V E,Zn-SOD1<sup>2SH</sup> samples. Assignments of backbone resonances were obtained using a combination of 2D <sup>1</sup>H-<sup>15</sup>N HSQC and 3D HNCACB, CBCA(CO)NH, HNCO, and HN(CA)CO experiments (57), described in detail previously (58).

**<sup>15</sup>N  $R_1$ ,  $R_{1\rho}$ , and <sup>15</sup>N{<sup>1</sup>H} NOE Values.** <sup>15</sup>N  $R_1$  and  $R_{1\rho}$  spin relaxation rates and <sup>15</sup>N{<sup>1</sup>H} NOE values were measured using pulse sequences described previously (59–61).  $R_1$  measurements were obtained with 10 relaxation delays from 10 ms to 1 s, while  $R_{1\rho}$  experiments were based on eight relaxation delays varying from 2 to 50 ms. Residue-specific  $R_1$  and  $R_{1\rho}$  values were obtained from fits of peak intensities vs. relaxation time to a single exponential decay function, while NOE ratios were ascertained directly from intensities in experiments recorded with (5-s relaxation delay followed by 7-s saturation) and without (relaxation delay of 12 s) <sup>1</sup>H saturation. Errors in NOE values were calculated

by propagating the error in the respective peak intensities.  $R_{1\rho}$  values were converted to  $R_2$  rates using the standard relation,  $R_{1\rho} = R_2 \sin^2\theta + R_1 \cos^2\theta$ , where  $\theta = \tan^{-1}(B_{SL}/\delta)$ ,  $B_{SL}$  is the spin-lock field strength ( $\sim 2$  kHz),  $\delta$  is the resonance offset of the spin in question (in hertz), and  $\theta$  is the angle of the effective field and the  $z$  axis.

**Isothermal Titration Calorimetry.** Samples of E,Zn-SOD1<sup>25H</sup> for isothermal titration calorimetry (ITC) were prepared by adding a stoichiometric amount of ZnSO<sub>4</sub> to apoSOD1<sup>25H</sup> (0.7–2 mM total monomer) followed by sample incubation at room temperature under anaerobic conditions for 30 min. ITC experiments were performed as described previously (29), using a Microcal Iso-

thermal Titration Calorimetry 200 instrument (Malvern). Small volumes (0.4–0.5  $\mu$ L) of concentrated pWT E,ZnSOD1<sup>25H</sup> solution were injected into an identical buffer in the ITC reaction cell.

**SOD1/CCS Chromatography-Based Binding Assays.** Proteins (purified SOD1 of the appropriate maturation state, CCS, or purified SOD1+CCS) were injected (total volume of 200  $\mu$ L using 50  $\mu$ M protein concentrations) onto a HiLoad 16/60 Superdex 75 column (GE Healthcare) with a 1-mL sample loop, 0.5 mL/min flow rate, and buffer composition of 20 mM MES, 1 mM TCEP, pH 6.3. For runs combining SOD1 with CCS, samples were mixed together at room temperature and incubated for 30 min before injection.

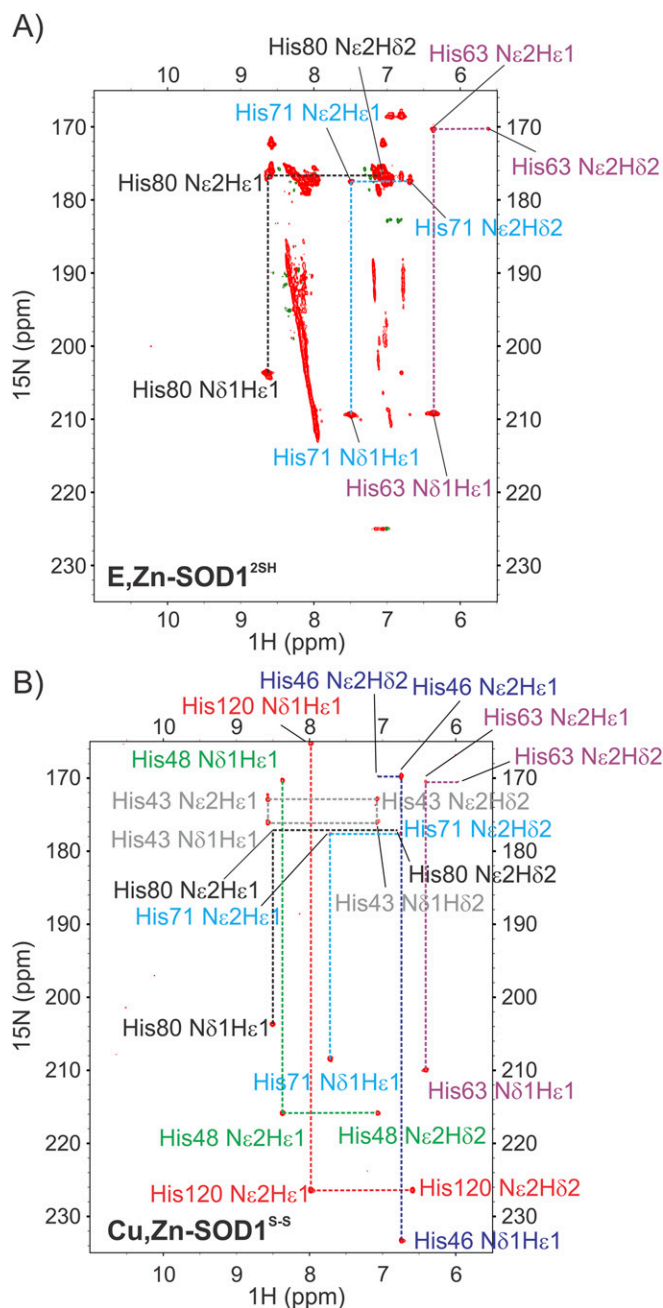

**Fig. S1.** Zn initially binds the SOD1 Zn site. (A) Side-chain <sup>1</sup>H-<sup>15</sup>N HMBC spectrum of E,Zn-SOD1<sup>25H</sup> with the residue-specific cross-peaks of His side chains connected with colored lines (black for H80, cyan for H71, and purple for H63). All three His ligands of the Zn ion, 63, 71, and 80, resonate at chemical shifts identical to those observed in Cu,Zn-SOD1<sup>S-S</sup> (B) demonstrating that the first Zn binding site in apoSOD1<sup>25H</sup> corresponds to the canonical Zn site. Note that the patterns of shifts indicate that the ligation of metal in the Zn site involves Nδ1 for all three His residues.
